# Supplementary material for: Preterm Infants’ Care and effects on Health Outcomes in Resource Limited Settings in the Central Region of Ghana
Source: Research Square preprint supplement (doi:10.21203/rs.3.rs-6136549/v1), 2025-05-06
Supplement: Supplementary file 1 [file 38e97e8526ecd86754c96fac.docx]

# STUDY INSTRUMENT

I am conducting a study on Preterm infants’ care and its effects on infants’ health outcome in the resource limited settings in the Central Region in partial fulfilment for the award of Mphil Public Health at the Catholic University of Ghana, Fiapre.

**Data Compilation Form**

**Section A: Preterm infants’ health outcomes**

1. Recovery:
2. Mortality/Co-morbidity:

**Section B: The types of care that influence preterm infants’ health outcomes**

1. Breastmilk only:
2. Infant formula only:
3. Breastmilk, incubator and antibiotics:
4. Incubator, breastmilk
5. Kangaroo mother care, breastmilk
6. Oxygen administration, incubator, breastmilk

**Section C: Preterm infants’ factors that influence preterm infants’ health outcomes**

1. Age of gestation:
2. Gender:
3. APGAR score
4. Place of birth:

**Section D: Health facility factors that influence preterm infants’ health outcomes**

1. Number of incubators:
2. Number of babies cots:
3. Staff strength:
4. Electricity supply:
5. In-service training:
